# Is There a Place for $\beta$ -Mimetics in Clinical Management of Neuropathic Pain? Salbutamol Therapy in Six Cases

Oya Yalcin Cok, M.D.,\* H. Evren Eker, M.D.,\*  
Ipek Yalcin, Pharm.D., Ph.D.,†  
Michel Barrot, Ph.D.,‡ Anis Aribogan, M.D.§

**T**HE Adrenergic system, because of its reported implication in pain mechanisms, may be a potential target for chronic pain treatment. A genetic polymorphism of catechol-*O*-methyltransferase, an enzyme that metabolizes catecholamines, is related with higher pain perception<sup>1</sup> and persistent pain conditions because patients with higher pain sensitivity are more likely to develop chronic pain conditions.<sup>2</sup> Moreover, catechol-*O*-methyltransferase inhibition increases pain sensitivity through augmented catecholamines and activation of  $\beta$ -adrenergic ( $\beta$ -AR) receptors.<sup>3</sup> Furthermore, a polymorphism of  $\beta_2$ -adrenoceptors ( $\beta_2$ -AR) has been associated with the risk for developing musculoskeletal pain disorders.<sup>4</sup> In agreement, clinical studies reported that  $\beta$ -AR antagonists were effective in chronic musculoskeletal pain conditions, such as fibromyalgia or temporomandibular disorder.<sup>5,6</sup> This effect on myalgic pain was observed in patients with altered sympathetic nervous function.<sup>6,7</sup>

In addition to musculoskeletal pain disorders, neuropathic pain is another major type of chronic pain. Neuropathic pain arises as a direct consequence of a lesion or a disease affecting the somatosensory system.<sup>8</sup> The prevalence of neuropathic pain has been reported to be around 6.9 and

8.2% in two large prevalence studies, and the annual incidence rate was estimated at 1%.<sup>9–11</sup> Even though patients with neuropathic symptoms are rather frequent, neuropathic pain is often challenging to treat and is generally resistant to commonly used therapeutics.<sup>12</sup> Treatment difficulties may be due to various underlying pathophysiologic mechanisms. Indeed, neuropathic pain can be initiated not only by various diseases such as diabetes or cancer but also by trauma, post-surgical injuries, or drug treatment of cancer or human immunodeficiency virus infection.<sup>9,12</sup>

Currently, antidepressants are one of the first-line treatment options in neuropathic pain management.<sup>8,12</sup> These drugs are indirect adrenergic agonists because they act through the blockade of aminergic reuptake sites and thus increase endogenous levels of noradrenaline. Recent studies on the action mechanisms of antidepressants in neuropathic pain revealed the critical role played by  $\beta_2$ -AR.<sup>13,14</sup> The absence or blockade of  $\beta_2$ -ARs suppresses the antiallodynic effects of a chronic antidepressant treatment in a neuropathic pain model.<sup>13,14</sup> Interestingly, preclinical studies have also reported that the chronic direct stimulation of  $\beta_2$ -ARs by agonists can alleviate neuropathic pain symptoms in a murine neuropathic pain model,<sup>15–17</sup> whereas a  $\beta$ -AR antagonist had no effect.<sup>14,16</sup> Thus, these findings differ from what was observed in musculoskeletal pain.

In this report, we show that the use of salbutamol, a short-acting  $\beta_2$ -AR agonist, provided satisfying symptom management in six patients with severe neuropathic pain resistant to previous therapy.

## CASE REPORTS

Six patients with severe neuropathic symptoms were referred to the pain clinic. Four men and two women, average age of 58.8 yr, were referred to our clinic for an average of 10 months. The symptoms in one patient were initiated by lumbar radiculopathy at levels L4–L5 (case 1), and one of the patients had bilateral lumbar spinal stenosis (case 5). The causes of neuropathic pain were traumatic in two patients (cases 2 and 4). In the two latter patients, neuropathic pain was due to lung cancer (cases 3 and 6). All patients had inadequate pain relief with previous therapies, including tricyclic antidepressants, nonsteroidal antiinflammatory drugs, gabapentin, pregabalin, opioids, and myorelaxants. In addition, two patients previously received therapies such as acupuncture and physical therapy other than medical treatment. The details of patient characteristics and the background of neuropathic pain are summarized in table 1.

After the routine assessment and physical examination of patients, we documented the pain intensity by visual analog pain scale and the accompanying neuropathic symptoms. The patients had no contraindication for the use of  $\beta_2$ -AR agonist

\* Consultant, § Professor, Department of Anesthesiology and Reanimation, Adana Research and Education Center, Baskent University, Adana, Turkey. † Postdoctoral Fellow, ‡ Research Director, Institut des Neurosciences Cellulaires et Intégratives, Centre National de la Recherche Scientifique, Strasbourg, France.

Received from the Department of Anesthesiology and Reanimation, Adana Research and Education Center, Baskent University, Adana, Turkey. Submitted for publication November 16, 2009. Accepted for publication January 12, 2010. Supported by the Department of Anesthesiology and Reanimation, Adana Research and Education Center, Baskent University, Adana, Turkey (salary: O.Y.C., H.E.E., and A.A.); the Centre National de la Recherche Scientifique, Strasbourg, France (contract UPR3212: M.B. and I.Y.); and by a Conectus/Oseo grant, Strasbourg, France (M.B. and I.Y.).

Address correspondence to Dr. Cok: Department of Anesthesiology and Reanimation, Adana Research and Education Center, Baskent University, Yuregir, Adana, Turkey. oyacok@yahoo.com. Information on purchasing reprints may be found at [www.anesthesiology.org](http://www.anesthesiology.org) or on the masthead page at the beginning of this issue. ANESTHESIOLOGY's articles are made freely accessible to all readers, for personal use only, 6 months from the cover date of the issue.

drugs. We stopped all previously used medications (table 1), except for the two patients with lung cancer who were still receiving their ongoing opioid treatment during salbutamol treatment. Then, the patients started to receive 4 mg salbutamol sustained release formula orally daily. All patients were contacted through telephone after 2 weeks of treatment. We checked whether they continued to take the drug and whether they reported any adverse effect of salbutamol. We then re-evaluated pain intensity and symptom improvement at the first visit after a month of salbutamol use. Pain scores of the patients were significantly decreased after 1 month of therapy, and percent of pain relief declared by the patients was high. All accompanying symptoms were improved, except for numbness in two patients. None of the patients complained of any side effect related to the drug during the period they used salbutamol. Table 2 shows the pre- and posttherapy pain scores, the initial and recovered symptoms of the patients, and the total duration of continuing therapy.

We tried to contact the patients while this report was being written. Four of the six patients responded to our calls. Three patients (cases 2, 4, and 5) were still using the drug for 10 months without reporting any side effect. These patients confirmed continuing pain relief and improved accompanying symptoms sustained to the same degree as the initial assessment after a month. The fourth patient (case 1) declared that although she had acceptable pain relief during treatment period, she stopped using the drug after 3 months on her own decision.

## Discussion

Optimizing the functions of the adrenergic system may provide pain relief because a primary dysfunction of adrenergic signaling has been reported in some, but not all, chronic pain conditions. Clinical studies have proposed a beneficial role of  $\beta$ -AR antagonists for musculoskeletal pain management,<sup>5,6</sup> because catechol-*O*-methyltransferase polymorphism influences pain perception and altered sympathetic nervous system activity can be observed in these patients.<sup>1,3,18</sup> However, catechol-*O*-methyltransferase polymorphism was reported to be unrelated to individual susceptibility to neuropathic pain, suggesting that persistent muscular pain and neuropathic pain may imply different mechanisms.<sup>19</sup>

Neuropathic pain often manifests itself with sensory symptoms and signs such as allodynia, aching, tingling, numbness, burning, cramp-like pain, stabbing, and shock-like pain, and these severe symptoms can have a significant effect on the quality of life of the patients.<sup>20,21</sup> However, every patient has a different presentation of neuropathic pain, and their responses to the medications that are recommended for the treatment of neuropathic pain may vary.<sup>21–23</sup> Thus, these drugs provide adequate pain relief to 40–60% of the patients only.<sup>12,20</sup> Mechanism-based approach for selection of neuropathic pain therapy may provide better pain relief.<sup>22,24</sup> Thanks to animal models, there is major progress in understanding the mechanisms of the neuropathic pain and treatment modalities, and potential new targets for treatment have been identified.<sup>25</sup>

Many drugs are available for neuropathic pain management; however, antidepressants remain a first-line treatment.<sup>12,23,26,27</sup> These drugs primarily act on aminergic reuptake sites.<sup>26</sup> Recent animal studies revealed that the noradrenaline recruited by antidepressants act through  $\beta_2$ -ARs to relieve neuropathic allodynia.<sup>13,14</sup> Indeed, the antiallodynic action of antidepressants is blocked by coadministration of a  $\beta_2$ -AR antagonist and is absent in  $\beta_2$ -AR-deficient mice.<sup>13,14</sup> Furthermore, pre-clinical studies have reported that a direct stimulation of  $\beta_2$ -ARs can be sufficient to alleviate neuropathic allodynia.<sup>15–17</sup> Indeed,  $\beta$ -mimetics such as bambuterol, clenbuterol, fenoterol, formoterol, isoprenaline, metaproterenol, procaterol, terbutaline, ritodrine, salbutamol, or salmeterol were shown to provide allodynia relief after chronic treatment in a murine model of neuropathic pain.<sup>15–17</sup> This action was reported to be similar to antidepressants.

In the current case report, the common feature of the patients was their resistance to previous therapeutic approaches for neuropathic pain and symptom management. They were referred to the pain clinic with moderate to severe symptoms and inadequate pain relief with ceased or ongoing therapies. They had no contraindication for the use of any  $\beta_2$ -AR agonist agent.

Because  $\beta_2$ -AR agonist agents are readily available and widely used drugs in medicine, they have well-described fea-

**Table 1.** The Characteristics of the Patients and Background of Neuropathic Pain

| Case No. | Age, yr | Gender | Weight, kg | Height, cm | Cause of the Neuropathic Pain | Referral to the Pain Clinic* | Previous Therapies                               |
|----------|---------|--------|------------|------------|-------------------------------|------------------------------|--------------------------------------------------|
| 1        | 75      | F      | 90         | 160        | Lumbar radiculopathy          | 2 mo                         | TCA, NSAID, physical therapy                     |
| 2        | 47      | M      | 65         | 170        | Traumatic                     | 2 mo                         | TCA, NSAID                                       |
| 3        | 70      | F      | 55         | 160        | Lung cancer                   | 2 mo                         | TCA, NSAID, pregabalin, fentanyl patch, tramadol |
| 4        | 60      | M      | 70         | 160        | Traumatic                     | 1 yr                         | TCA, NSAID, gabapentin steroid                   |
| 5        | 44      | M      | 80         | 165        | Lumbar spinal stenosis        | 1 yr                         | TCA, myorelaxants, acupuncture                   |
| 6        | 57      | M      | 60         | 170        | Lung cancer                   | 2.5 yr                       | TCA, NSAID, fentanyl patch, tramadol             |

\* Delay between first visit at our pain clinic and the start of salbutamol treatment.

NSAID = nonsteroidal antiinflammatory drugs; TCA = tricyclic antidepressants.

**Table 2.** Pre- and Posttherapy Visual Analog Pain Scores, Initial and Recovered Symptoms, and Duration of Therapy

| Case No. | Pretherapy VAS | Posttherapy VAS | Decrease in VAS Declared by Patient, % | Initial Symptoms                                                       | Unimproved Symptoms | Side Effects | Total Duration of Therapy, mo |
|----------|----------------|-----------------|----------------------------------------|------------------------------------------------------------------------|---------------------|--------------|-------------------------------|
| 1        | 8              | 0               | 99                                     | Aching, allodynia, tingling, numbness                                  | None                | None         | 7                             |
| 2        | 9              | 4               | 50                                     | Pain, allodynia, burning sensation, numbness                           | None                | None         | 5                             |
| 3        | 6              | 0               | 90                                     | Aching, allodynia, tingling, numbness                                  | Numbness            | None         | 5                             |
| 4        | 10             | 5               | 50                                     | Pain, allodynia, stabbing, numbness                                    | None                | None         | 1                             |
| 5        | 10             | 4               | 60                                     | Stabbing pain, cramp-like pain, allodynia, burning sensation, numbness | Numbness            | None         | 2                             |
| 6        | 10             | 3               | 75                                     | Stabbing and shock-like pain, allodynia, numbness                      | None                | None         | 3.5                           |

VAS = Visual Analog Pain Scale.

tures and adverse effects. Although both nonselective and selective  $\beta_2$ -AR agonists suppressed allodynia after chronic treatment,<sup>15–17</sup> we preferred to use a short-acting selective  $\beta_2$ -AR agonist to limit the undesirable events at the very least. Thus, we chose salbutamol, also known as albuterol in the United States, in a slow-release form to increase compliance of the patients and to limit potential side effects. The use of a nonselective agonist would have more systemic side effects, and possible adverse events initiated by a long-acting agent would have persisted longer.

All patients achieved significant symptom relief, especially in pain, after salbutamol use for a month. Other neuropathic symptoms were also improved. Interestingly, we observed a relief of allodynia, which is usually considered as an extremely treatment-resistant symptom in neuropathic pain. Potential adverse effects associated with the use of salbutamol may include fine tremor, dry mouth, nervousness, headache, muscle cramps, tachycardia, arrhythmias, and sweating. None of the six patients reported these adverse events at the dose used in this study. This lack of adverse events and satisfaction with the treatment provided patient compliance with the treatment.

Our findings proposing a beneficial action of a  $\beta_2$ -AR agonist in neuropathic pain condition somehow seem to be contrary to the proposed beneficial role of  $\beta$ -AR antagonists in musculoskeletal pain conditions. However, various types of pain may indicate various underlying mechanisms and require different therapeutic approaches. Indeed, even for musculoskeletal pain, the study of  $\beta_2$ -AR haplotypes suggested that either  $\beta_2$ -AR hyperfunction (60–70% of patients) or hypofunction (25–30% of patients) may contribute to the pain condition.<sup>4</sup> In this regard, patients with

$\beta_2$ -AR hypofunction should not respond to treatment with an antagonist.<sup>4</sup> Tailoring the patients' management according to the different types of chronic pain and their underlying mechanism may thus be critical for successful management of chronic pain conditions.

In conclusion, we suggest that salbutamol may be an effective treatment option in patients with neuropathic pain resistant to commonly used therapeutics. However, one should prudently interpret the results, because the current findings were obtained without blinding, randomization, or a control group. This case report may encourage further randomized, controlled, prospective, and blinded studies to evaluate more thoroughly the use of  $\beta$ -mimetic agents as therapeutic alternatives for neuropathic pain.

## References

1. Diatchenko L, Nackley AG, Slade GD, Bhalang K, Belfer I, Max MB, Goldman D, Maixner W: Catechol-O-methyltransferase gene polymorphisms are associated with multiple pain-evoking stimuli. *Pain* 2006; 125:216–24
2. Diatchenko L, Slade GD, Nackley AG, Bhalang K, Sigurdson A, Belfer I, Goldman D, Xu K, Shabalina SA, Shagin D: Genetic basis for individual variations in pain perception and the development of a chronic pain condition. *Hum Mol Genet* 2005; 14:135–43
3. Nackley AG, Tan KS, Fecho K, Flood P, Diatchenko L, Maixner W: Catechol-O-methyltransferase inhibition increases pain sensitivity through activation of both beta2- and beta3-adrenergic receptors. *Pain* 2007; 128:199–208
4. Diatchenko L, Anderson AD, Slade GD, Fillingim RB, Shabalina SA, Higgins TJ, Sama S, Belfer I, Goldman D, Max MB: Three major haplotypes of the beta2 adrenergic receptor define psychological profile, blood pressure, and the risk for development of a common musculoskeletal pain disorder. *Am J Med Genet B Neuropsychiatr Genet* 2006; 141B: 449–62

5. Wood PB, Kablinger AS, Caldito GS: Open trial of pindolol in the treatment of fibromyalgia. *Ann Pharmacother* 2005; 39:1812-6
6. Light KC, Bragdon EE, Grewen KM, Brownley KA, Girdler SS, Maixner W: Adrenergic dysregulation and pain with and without acute beta-blockade in women with fibromyalgia and temporomandibular disorder. *J Pain* 2009; 10: 542-52
7. Gur A, Oktayoglu P: Central nervous system abnormalities in fibromyalgia and chronic fatigue syndrome: New concepts in treatment. *Curr Pharm Des* 2008; 14:1274-94
8. Loeser JD, Treede RD: The Kyoto protocol of IASP Basic Pain Terminology. *Pain* 2008; 137:473-7
9. Bouhassira D, Lanteri-Minet M, Attal N, Laurent B, Touboul C: Prevalence of chronic pain with neuropathic characteristics in the general population. *Pain* 2008; 136:380-7
10. Torrance N, Smith BH, Bennett MI, Lee AJ: The epidemiology of chronic pain of predominantly neuropathic origin. Results from a general population survey. *J Pain* 2006; 7:281-9
11. Dieleman JP, Kerklaan J, Huygen FJPM, Bouma PAD, Sturkenboom MCJM: Incidence rates and treatment of neuropathic pain conditions in the general population. *Pain* 2008; 137:681-8
12. Dworkin RH, O'Connor AB, Backonja M, Farrar JT, Finnerup NB, Jensen TS, Kalso EA, Loeser JD, Miaskowski C, Nurmikko TJ: Pharmacologic management of neuropathic pain: Evidence-based recommendations. *Pain* 2007; 132: 237-51
13. Yalcin I, Tessier LH, Petit-Demoulière N, Doridot S, Hein L, Freund-Mercier MJ, Barrot M: Beta2-adrenoceptors are essential for desipramine, venlafaxine or reboxetine action in neuropathic pain. *Neurobiol Dis* 2009; 33:386-94
14. Yalcin I, Choucair-Jaafar N, Benbouzid M, Tessier LH, Muller A, Hein L, Freund-Mercier MJ, Barrot M: Beta(2)-adrenoceptors are critical for antidepressant treatment of neuropathic pain. *Ann Neurol* 2009; 65:218-25
15. Barrot M, Yalcin I, Choucair-Jaafar N, Benbouzid M, Freund-Mercier MJ: From antidepressant drugs to beta-mimetics: Preclinical insights on potential new treatments for neuropathic pain. *Recent Pat CNS Drug Discov* 2009; 4:182-9
16. Choucair-Jaafar N, Yalcin I, Rodeau J, Waltisperger E, Freund-Mercier M, Barrot M:  $\beta$ 2-Adrenoceptor agonists alleviate neuropathic allodynia in mice after chronic treatment. *Br J Pharmacol* 2009; 158:1683-94
17. Yalcin I, Tessier LH, Petit-Demoulière N, Waltisperger E, Hein L, Freund-Mercier MJ, Barrot M: Chronic treatment with agonists of beta(2)-adrenergic receptors in neuropathic pain. *Exp Neurol* 2010; 221:115-21
18. Gürsoy S, Erdal E, Herken H, Madenci E, Alaçsehirli B, Erdal N: Significance of catechol-O-methyltransferase gene polymorphism in fibromyalgia syndrome. *Rheumatol Int* 2003; 23:104-7
19. Armero P, Muriel C, Santos J, Sánchez-Montero FJ, Rodríguez RE, González-Sarmiento R: COMT (Val158Met) polymorphism is not associated to neuropathic pain in a Spanish population. *Eur J Pain* 2005; 9:229-32
20. Attal N, Cruccu G, Haanpää M, Hansson P, Jensen TS, Nurmikko T, Sampaio C, Sindrup S, Wiffen P, EFNS Task Force: EFNS guidelines on pharmacological treatment of neuropathic pain. *Eur J Neurol* 2006; 13:1153-69
21. Baron R: Mechanisms of disease: Neuropathic pain-A clinical perspective. *Nat Clin Pract Neurol* 2006; 2:95-106
22. Attal N, Fermanian C, Fermanian J, Lanteri-Minet M, Alchaar H, Bouhassira D: Neuropathic pain: Are there distinct subtypes depending on the aetiology or anatomical lesion? *Pain* 2008; 138:343-53
23. Davis MP: What is new in neuropathic pain? *Support Care Cancer* 2007; 15:363-72
24. Segerdahl M: Improving early clinical drug development for neuropathic pain by improving patient selection. *Pain* 2009; 141:4-5
25. Zieglgänsberger W, Berthele A, Tölle TR: Understanding neuropathic pain. *CNS Spectr* 2005; 10:298-308
26. Gidal BE: New and emerging treatment options for neuropathic pain. *Am J Manag Care* 2006; 12:S269-78
27. Mattia C, Paoletti F, Coluzzi F, Boanelli A: New antidepressants in the treatment of neuropathic pain. A review. *Minerva Anestesiol* 2002; 68:105-14
